# Supplementary material
Source: PubMed Central journal article supplement (PMC9107507)

# Supplementary Figure 1

A

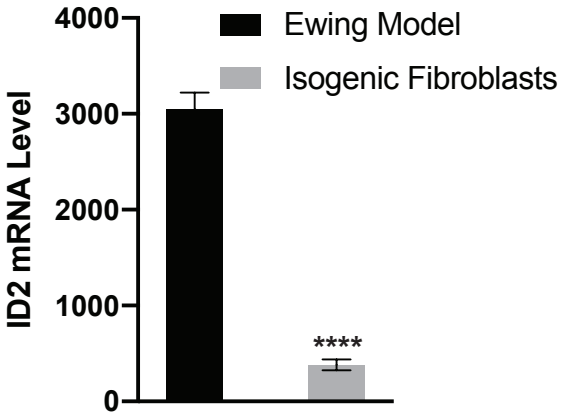

B

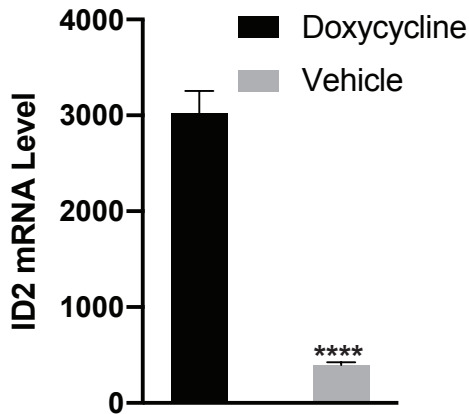

Supplement: NIHMS1794784-supplement-Supplementary_Figure_1.pdf [file NIHMS1794784-supplement-Supplementary_Figure_1.pdf]

# Supplementary Figure 10

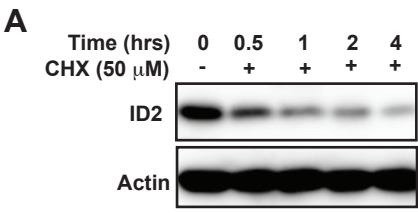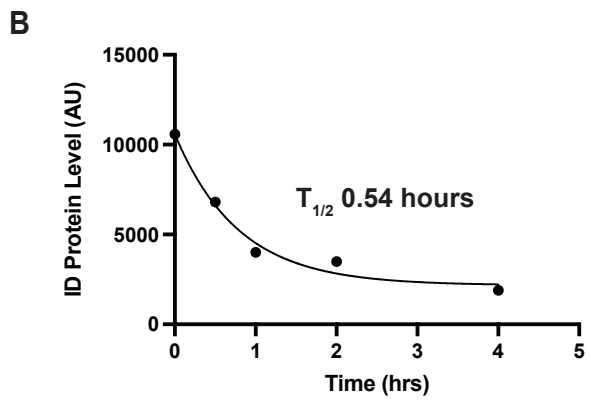

Supplement: NIHMS1794784-supplement-Supplementary_Figure_10.pdf [file NIHMS1794784-supplement-Supplementary_Figure_10.pdf]

# Supplementary Figure 11

**A**

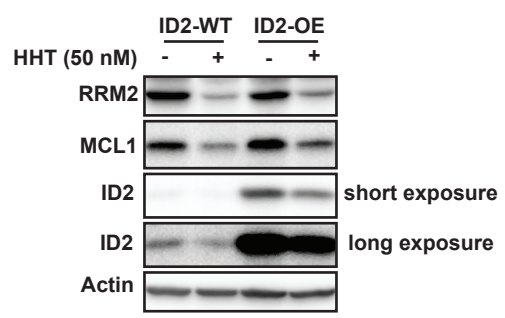

**B**

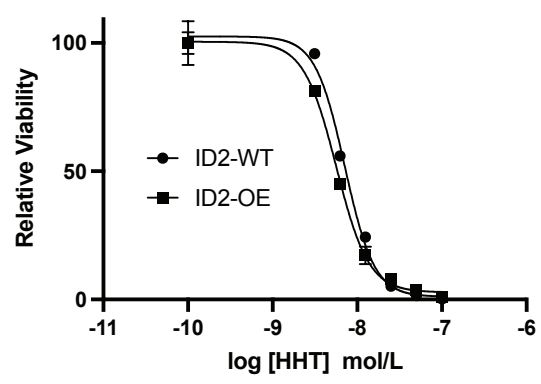

Supplement: NIHMS1794784-supplement-Supplementary_Figure_11.pdf [file NIHMS1794784-supplement-Supplementary_Figure_11.pdf]

# Supplementary Figure 12

**A**

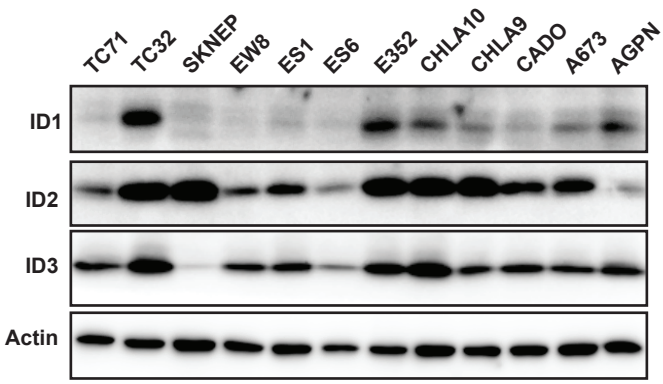

**B**

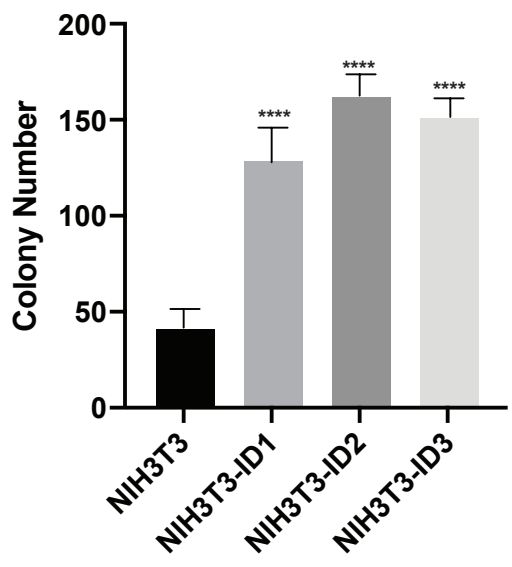

Supplement: NIHMS1794784-supplement-Supplementary_Figure_12.pdf [file NIHMS1794784-supplement-Supplementary_Figure_12.pdf]

Supplementary Figure 2

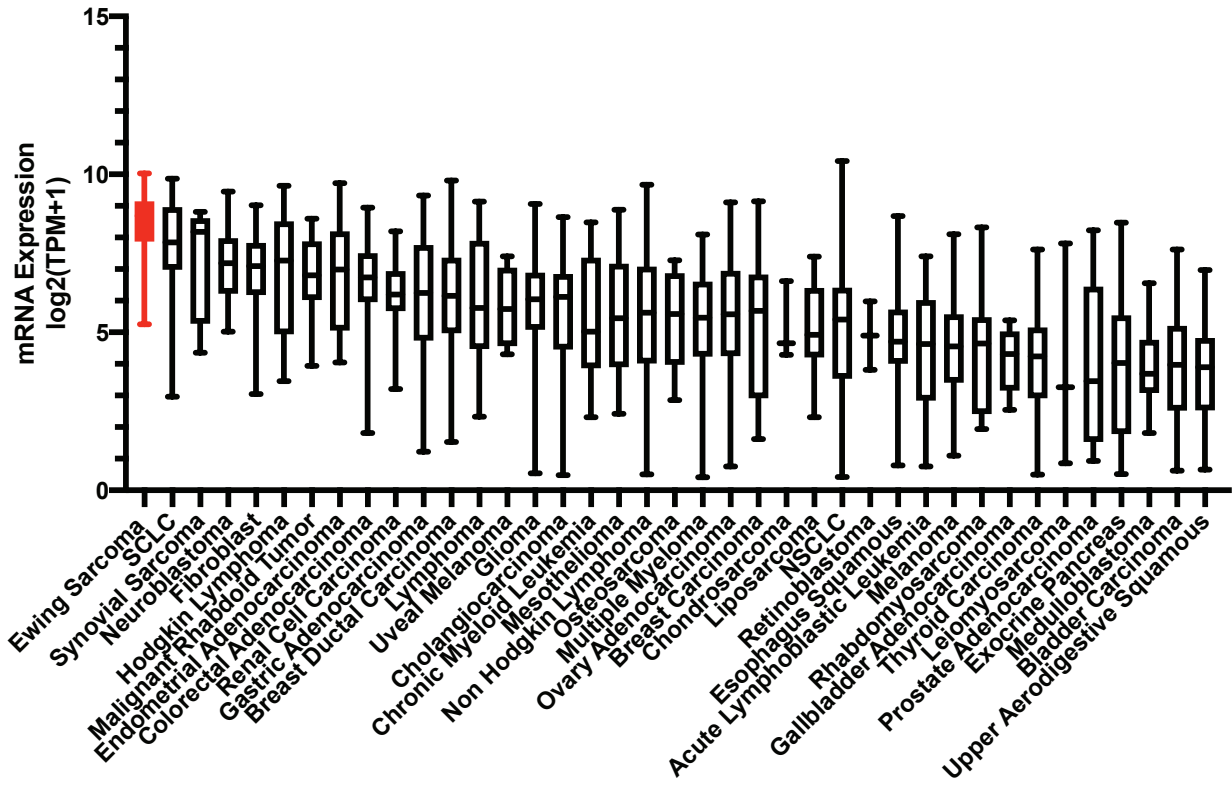

Supplement: NIHMS1794784-supplement-Supplementary_Figure_2.pdf [file NIHMS1794784-supplement-Supplementary_Figure_2.pdf]

# Supplementary Figure 3

A

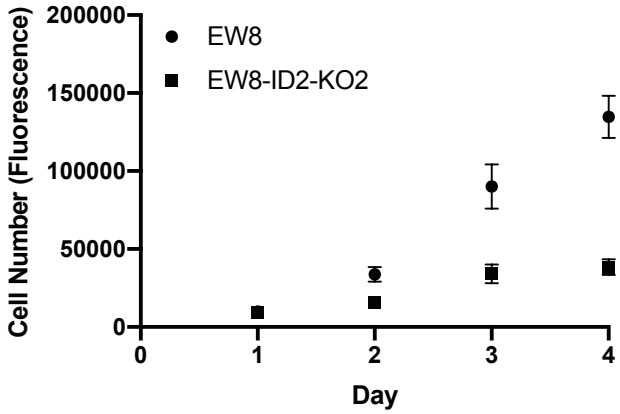

B

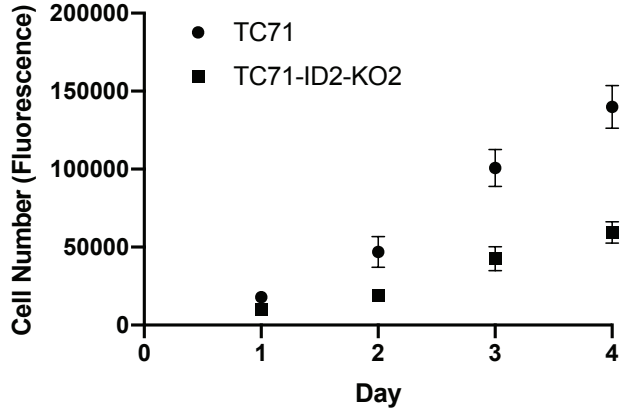

Supplement: NIHMS1794784-supplement-Supplementary_Figure_3.pdf [file NIHMS1794784-supplement-Supplementary_Figure_3.pdf]

Supplementary Figure 4

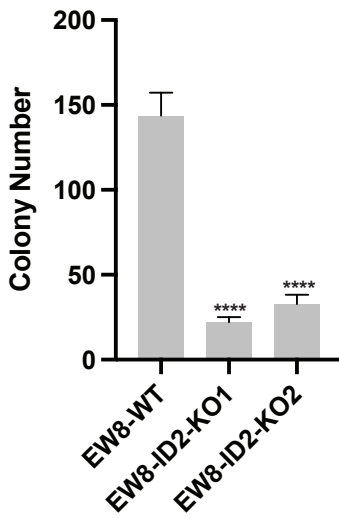

Supplement: NIHMS1794784-supplement-Supplementary_Figure_4.pdf [file NIHMS1794784-supplement-Supplementary_Figure_4.pdf]

Supplementary Figure 5

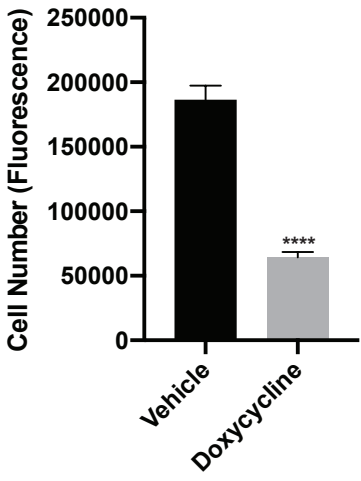

Supplement: NIHMS1794784-supplement-Supplementary_Figure_5.pdf [file NIHMS1794784-supplement-Supplementary_Figure_5.pdf]

Supplementary Figure 6

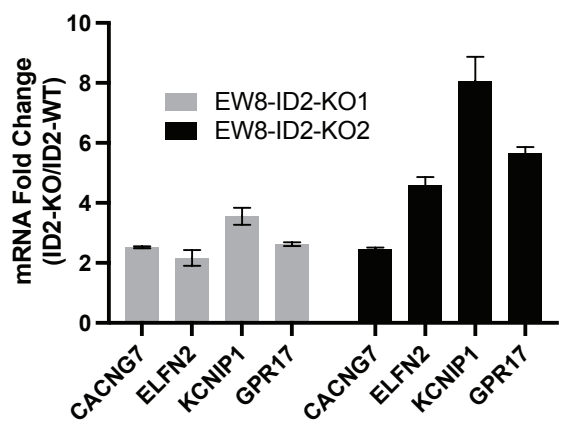

Supplement: NIHMS1794784-supplement-Supplementary_Figure_6.pdf [file NIHMS1794784-supplement-Supplementary_Figure_6.pdf]

# Supplementary Figure 7

**A**

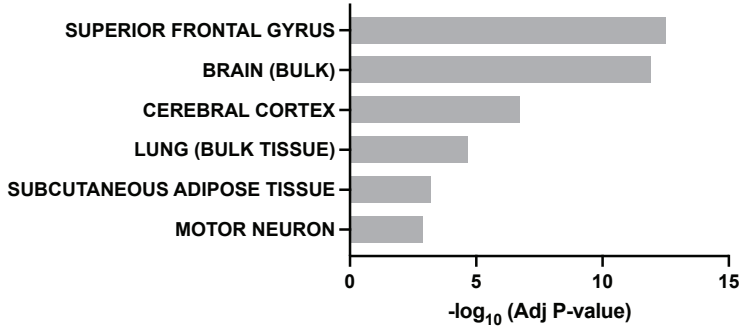

**B**

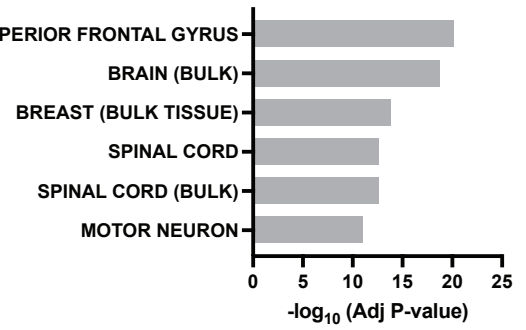

**C**

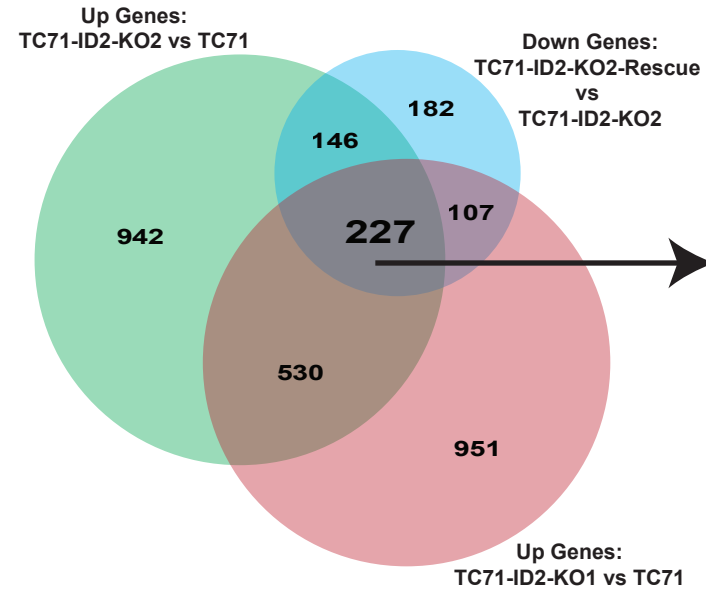

**D**

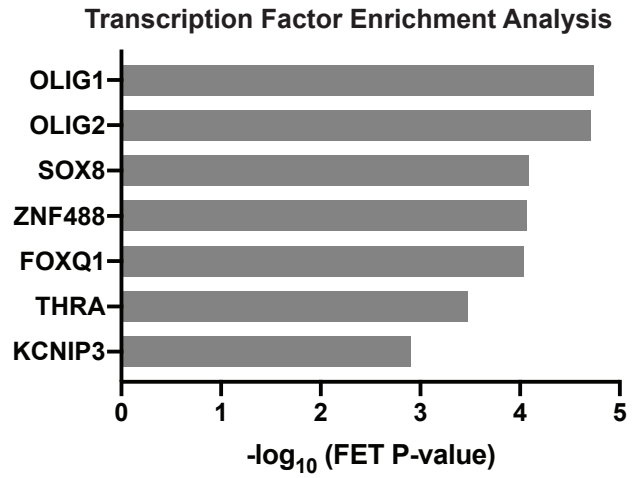

**E**

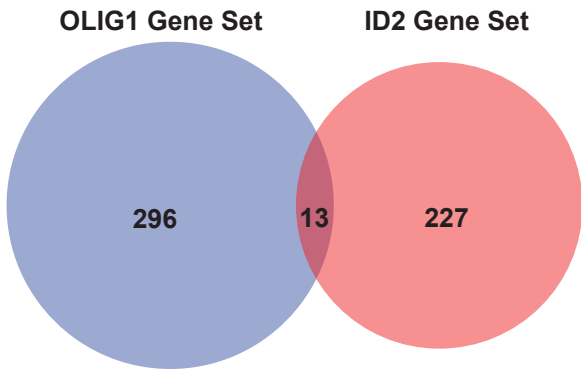

**F**

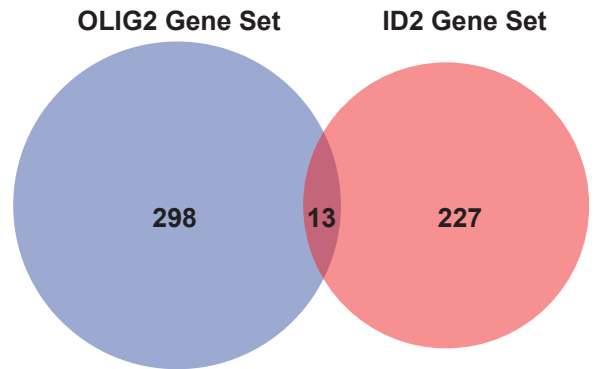

Supplement: NIHMS1794784-supplement-Supplementary_Figure_7.pdf [file NIHMS1794784-supplement-Supplementary_Figure_7.pdf]

# Supplementary Figure 8

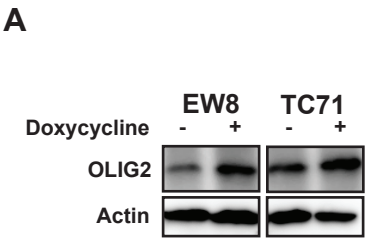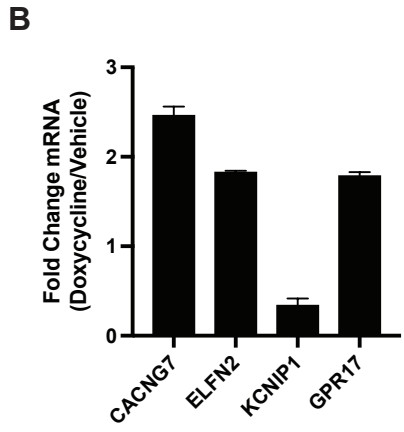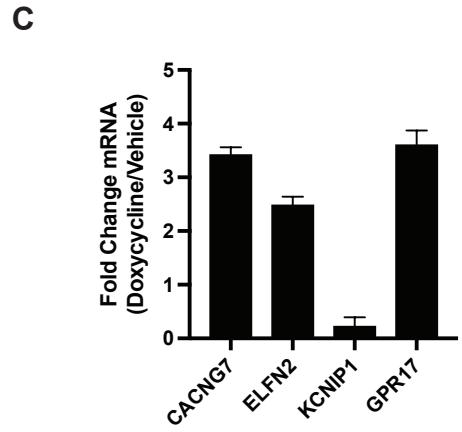

Supplement: NIHMS1794784-supplement-Supplementary_Figure_8.pdf [file NIHMS1794784-supplement-Supplementary_Figure_8.pdf]

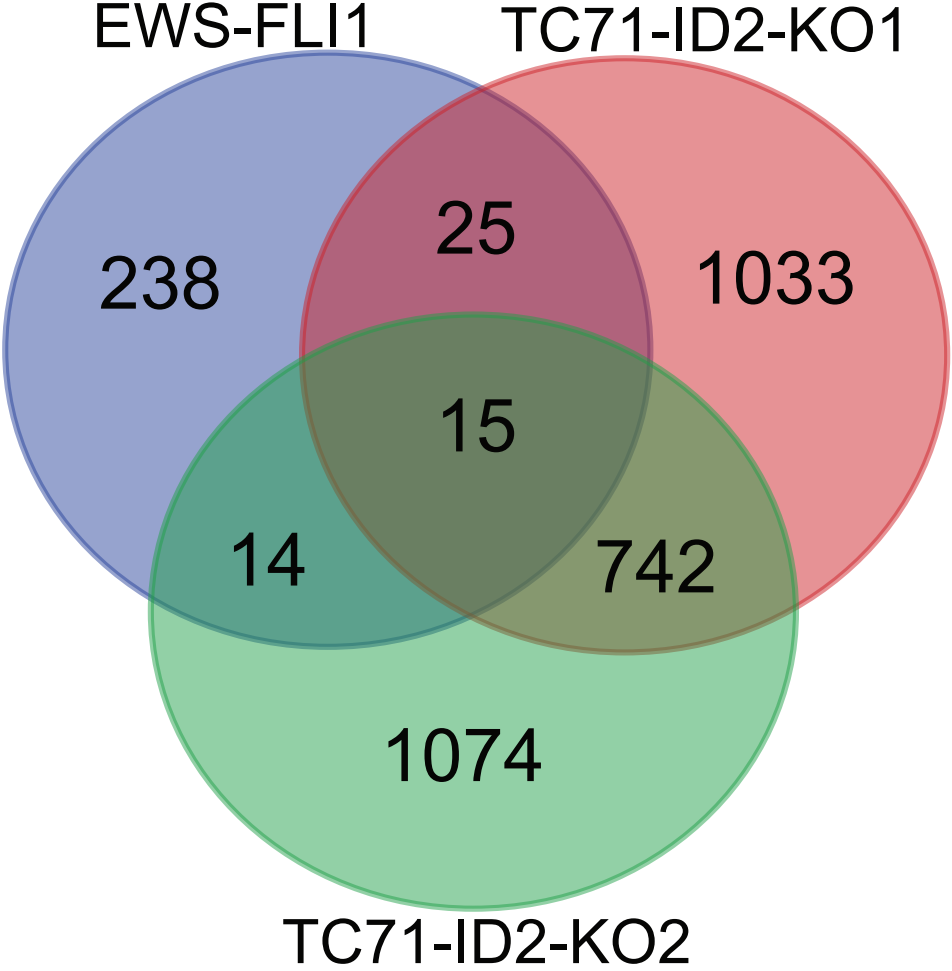

EWS-FLI1 - TC71-ID2-KO1: hypergeometric p-value < 0.02  
EWS-FLI1 - TC71-ID2-KO2: hypergeometric p-value Not Significant

Supplement: NIHMS1794784-supplement-Supplementary_Figure_9.pdf [file NIHMS1794784-supplement-Supplementary_Figure_9.pdf]
